# Supplementary material for: Investigating the functionality of an OCT4-short response element in human induced pluripotent stem cells
Source: PubMed Central journal article supplement — Mol Ther Methods Clin Dev. 2016 Jul 20;3:16050–. doi: 10.1038/mtm.2016.50 (PMC4954563; doi:10.1038/mtm.2016.50), 2016-07-20
Supplement: mtm201650-s1.pdf [file mtm201650-s1.pdf]

**Figure S1.** Comparing OCT4<sub>SRE</sub> activity with that of the full length OCT4 promoter.

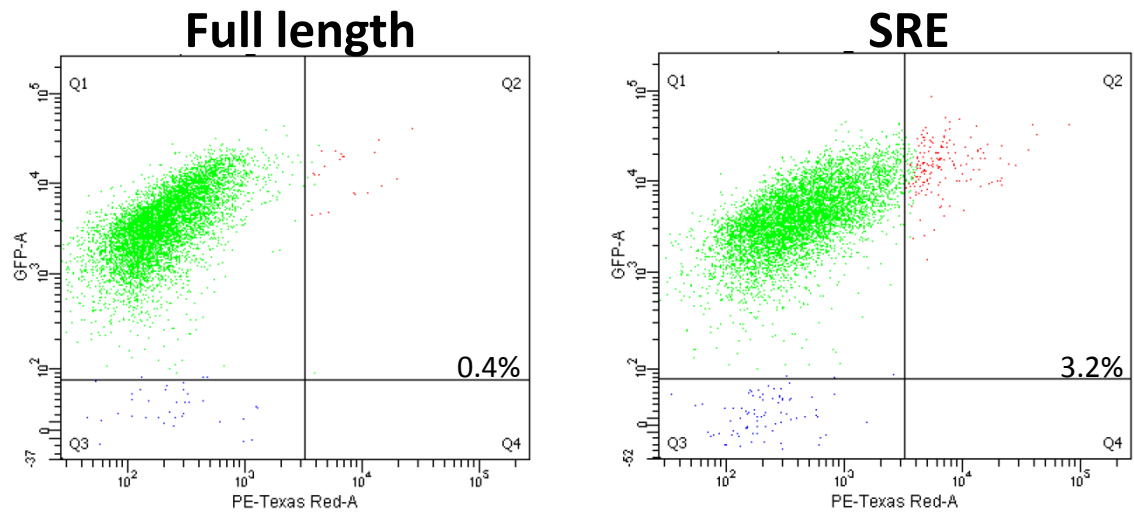

Flow cytometry was utilized to compare the number of double positive fibroblasts from the OCT4<sub>SRE</sub> with that of the full length OCT4 promoter.

**Figure S2.** Immunophenotyping for *in vitro* tri-lineage differentiation

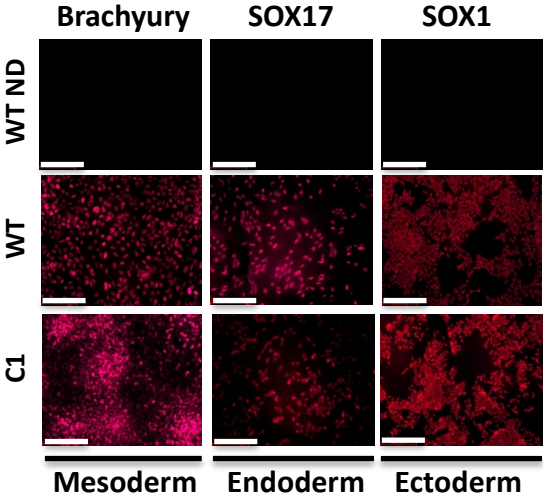

Immunophenotyping for *in vitro* tri-lineage differentiation where mesoderm = brachyury, endoderm = SRY (sex determining region Y)-box 17) (Sox17) and, ectoderm = SRY (sex determining region Y)-box 1) (Sox1) expression. Cell types of image from top to bottom are: AD2 hiPSC wild type not differentiated (WT ND), AD2 hiPSC wild type (WT), AD2 hiPSC C1 expressing Stb/eGFP (C1). For (A) and (B) monocolor camera with pseudocolor pink for Cy5:Alexa647 secondary staining was used. (Bar = 200  $\mu$ m)

**Figure S3.** Differentiation leads to OCT4<sub>SRE</sub> inactivation.

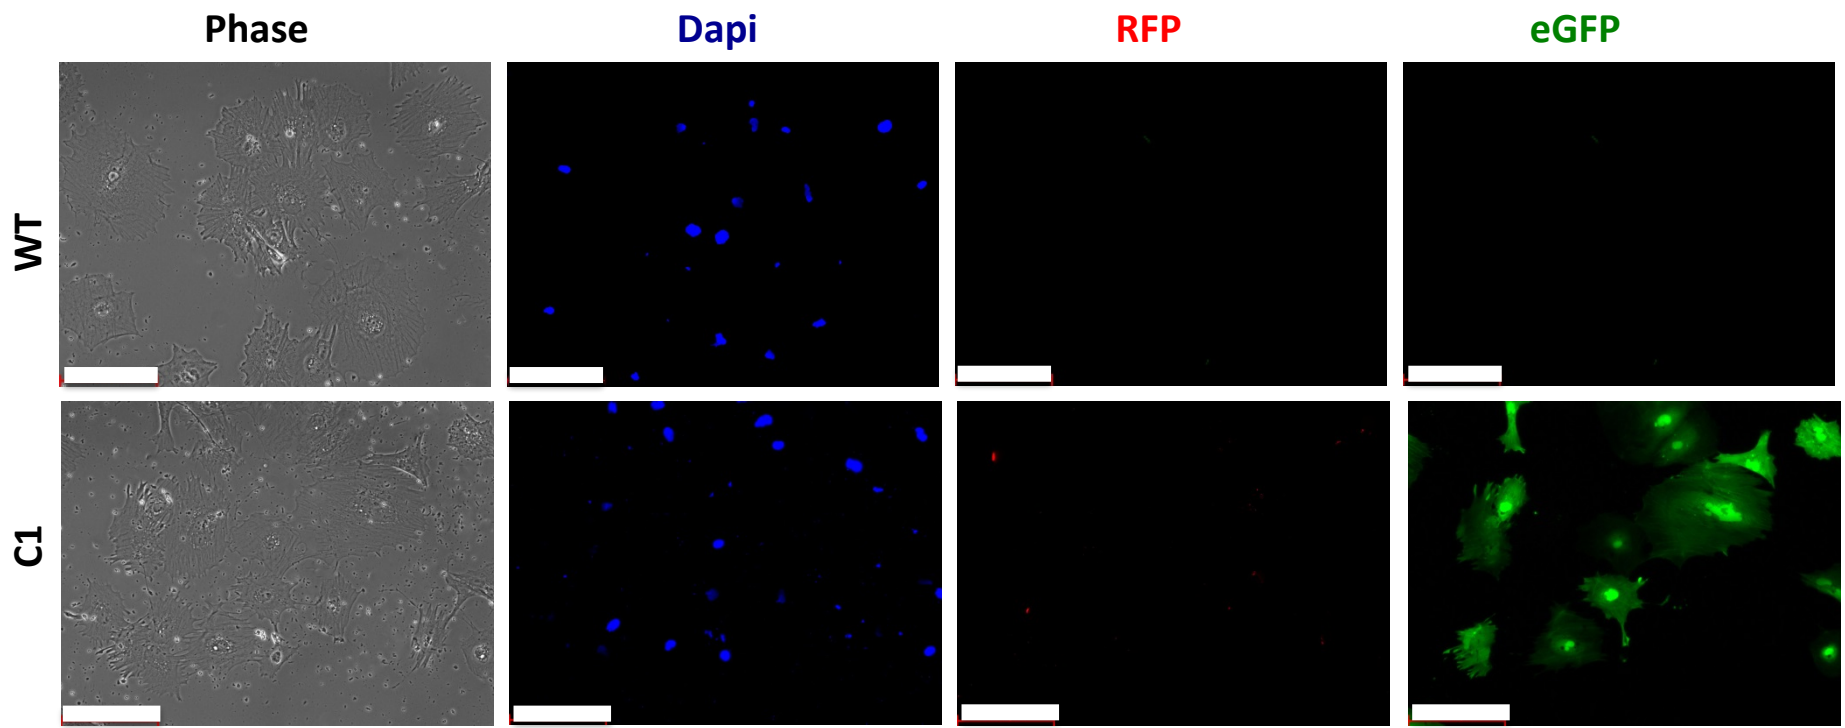

High35% Stb/eGFP-double positive fraction post-2x FACS SORT was collected for AD2 hiPSC C1 and converted to DCM conditions. ICC staining of one week DCM-treated derivatives are shown where blue = Dapi, RFP = Stb expression driven by OCT4<sub>SRE</sub>, eGFP = EF1 $\alpha$ -eGFP. The cells are AD2 hiPSC wild type (WT) and AD2 hiPSC clone 1 (C1). Clone 1 is expressing only eGFP with OCT4<sub>SRE</sub>-mediated Stb transcription inactivated. (Bar = 200  $\mu$ m)
